# Supplementary material for: Particulate gel liquid marbles
Source: Royal Society of Chemistry journal article supplement (doi:10.1039/d4ta02203c), 2024-01-01
Supplement: d4ta02203c1.xlsx [file d4ta02203c1.xlsx]

## Sheet: Figure 2D
X axis	Y axis	Y axis error
0	91.5539	41.394
0.1	59.4361	23.7908
0.5	56.7702	24.3631
1	76.1403	28.2434
1.2	203.346	90.7451
1.3	542.369	346.801
1.5	3329.47	693.85

## Sheet: Figure 2E
X axis	Y axis	Y axis error
0	0.69416	0.163689
0.1	0.619231	0.177172
0.5	0.662461	0.180263
1	0.703689	0.172363
1.2	0.70089	0.158509
1.3	0.730719	0.126884
1.5	0.882391	0.0923956

## Sheet: Figure 3D
X axis	Y axis	Y axis error
0	33.7124	3.46439
0.1	35.3126	0.791486
0.5	48.02	4.45836
1	35.7732	2.36162
1.2	37.2186	1.86128
1.3	28.1594	0.824577
1.5	0	0

## Sheet: Figure 4C
Control LM							V=0.5mL							V=1.0mL							V=1.2mL
X axis	Y axis	Y axis	Y axis	Y axis	Y axis		X axis	Y axis	Y axis	Y axis	Y axis	Y axis		X axis	Y axis	Y axis	Y axis	Y axis	Y axis		X axis	Y axis	Y axis	Y axis	Y axis	Y axis
0	0	0	0	0	0		0	0	0	0	0	0		0	0	0	0	0	0		0	0	0	0	0	0
0.0232531	0.00980665	0	0.00980665	0.00980665	0.0490333		0.0225124	0.00980665	0.00980665	0.00980665	0.00980665	0.0490333		0.0219394	0	0	0.02942	0.0490333	0.00980665		0.0183352	0.0490333	0.0392266	0.0490333	0.00980665	0.0392266
0.0465062	0.02942	0.00980665	0.0196133	0.0196133	0.0588399		0.0450248	0.0196133	0.0196133	0.0196133	0.00980665	0.11768		0.0438789	0.00980665	0	0.0392266	0.0686466	0.0196133		0.0366703	0.0882598	0.0588399	0.0392266	0.0784532	-0.00980665
0.0697593	0.0392266	0.0196133	0.02942	0.02942	0.0588399		0.0675371	0.02942	0.02942	0.02942	0.00980665	0.107873		0.0658183	0.0196133	0.0588399	0.0490333	0.0784532	0.02942		0.0550055	0.156906	0.17652	0.0588399	0.0980665	0.107873
0.0930123	0.11768	0.02942	0.107873	0.0392266	0.0588399		0.0900495	0.0392266	0.0392266	0.0392266	0.0196133	0.127486		0.0877578	0.0980665	0.0784532	0.0588399	0.0784532	0.0392266		0.0733407	0.17652	0.245166	0.0784532	0.107873	0.284393
0.116265	0.127486	0.0980665	0.11768	0.0490333	0.0686466		0.112562	0.0490333	0.0588399	0.0980665	0.02942	0.127486		0.109697	0.11768	0.0882598	0.0588399	0.0784532	0.0490333		0.0916758	0.196133	0.0784532	0.0980665	0.11768	0.23536
0.139519	0.156906	0.107873	0.1471	0.0686466	0.0784532		0.135074	0.0686466	0.0686466	0.127486	0.0392266	0.127486		0.131637	0.107873	0.0882598	0.0588399	0.0882598	0.127486		0.110011	0.215746	0.0196133	0.11768	0.137293	0.186326
0.162772	0.166713	0.11768	0.166713	0.137293	0.0784532		0.157587	0.137293	0.0882598	0.1471	0.0490333	0.127486		0.153576	0.107873	0.0882598	0.0686466	0.0882598	0.137293		0.128346	0.245166	0.02942	0.127486	0.137293	0.225553
0.186025	0.186326	0.127486	0.186326	0.1471	0.0980665		0.180099	0.166713	0.156906	0.156906	0.0588399	0.17652		0.175516	0.107873	0.0980665	0.0686466	0.0980665	0.1471		0.146681	0.26478	0.0490333	0.127486	0.1471	0.26478
0.209278	0.20594	0.137293	0.196133	0.166713	0.156906		0.202611	0.17652	0.186326	0.186326	0.127486	0.17652		0.197455	0.107873	0.0980665	0.0686466	0.166713	0.17652		0.165017	0.284393	0.0686466	0.137293	0.1471	0.274586
0.232531	0.215746	0.137293	0.23536	0.196133	0.17652		0.225124	0.196133	0.20594	0.20594	0.156906	0.186326		0.219394	0.0980665	0.107873	0.0784532	0.17652	0.20594		0.183352	0.294199	0.137293	0.186326	0.1471	0.274586
0.255784	0.0980665	0.196133	0.26478	0.215746	0.196133		0.247636	0.215746	0.23536	0.23536	0.17652	0.23536		0.241334	0.0980665	0.107873	0.0882598	0.20594	0.225553		0.201687	0.313813	0.156906	0.196133	0.215746	0.274586
0.279037	0.0392266	0.215746	0.294199	0.254973	0.215746		0.270149	0.26478	0.254973	0.26478	0.20594	0.274586		0.263273	0.0980665	0.11768	0.0882598	0.225553	0.254973		0.220022	0.382459	0.166713	0.196133	0.23536	0.323619
0.30229	0.0196133	0.254973	0.343233	0.274586	0.245166		0.292661	0.26478	0.284393	0.294199	0.225553	0.304006		0.285213	0.0980665	0.11768	0.0980665	0.245166	0.274586		0.238357	0.451106	0.215746	0.20594	0.26478	0.353039
0.325543	0	0.274586	0.245166	0.294199	0.26478		0.315173	0.313813	0.323619	0.323619	0.245166	0.323619		0.307152	0.0980665	0.127486	0.166713	0.254973	0.304006		0.256692	0.490333	0.254973	0.215746	0.284393	0.372653
0.348796	0.00980665	0.313813	0.0392266	0.382459	0.304006		0.337686	0.353039	0.362846	0.343233	0.284393	0.353039		0.329092	0.0980665	0.186326	0.186326	0.294199	0.343233		0.275028	0.539366	0.274586	0.254973	0.313813	0.382459
0.372049	0.02942	0.343233	0.0392266	0.362846	0.333426		0.360198	0.372653	0.392266	0.421686	0.304006	0.402073		0.351031	0.0980665	0.215746	0.196133	0.343233	0.392266		0.293363	0.764919	0.304006	0.284393	0.362846	0.441299
0.395302		0.196133	0.0196133	0.421686	0.372653		0.38271	0.431493	0.421686	0.451106	0.343233	0.451106		0.372971	0.107873	0.245166	0.215746	0.392266	0.431493		0.311698	0.706079	0.343233	0.333426	0.421686	0.480526
0.418556		0	0.00980665	0.470719	0.411879		0.405223	0.441299	0.470719	0.509946	0.382459	0.490333		0.39491	0.107873	0.284393	0.245166	0.431493	0.490333		0.330033	0.686466	0.382459	0.353039	0.470719	0.529559
0.441809		0.00980665	0.00980665	-0.00980665	0.127486		0.427735	0.549172	0.529559	0.500139	0.431493	0.558979		0.416849	0.107873	0.313813	0.294199	0.470719	0.539366		0.348368	0.696272	0.441299	0.372653	0.490333	0.637432
0.465062		0.0392266	0	0.00980665	0.0392266		0.450248	0.588399	0.107873	0.137293	0.480526	0.617819		0.438789	0.107873	0.333426	0.333426	0.529559	0.578592		0.366703	0.715885	0.470719	0.411879	0.529559	0.696272
0.488315		0.0686466	0.02942	-0.00980665	0.0686466		0.47276	0.676659	0.127486	0.137293	0.529559	0.696272		0.460728	0.107873	0.392266	0.362846	0.578592	0.647239		0.385039	0.774725	0.490333	0.451106	0.588399	0.794339
0.511568		0.0980665	0.0588399	0	0.107873		0.495272	0.666852	0.11768	0.127486	0.588399	0.764919		0.482668	0.107873	0.431493	0.411879	0.647239	0.715885		0.403374	0.813952	0.539366	0.500139	0.666852	0.862985
							0.517785	0.794339	0.127486	0.127486	0.657046	0.833565		0.504607	0.107873	0.470719	0.441299	0.715885	0.794339		0.421709	0.833565	0.558979	0.529559	0.725692	0.961052
							0.540297	0.892405	0.127486	0.127486	0.735499	0.921825		0.526547	0.107873	0.509946	0.480526	0.804145	0.813952		0.440044	0.892405	0.568786	0.558979	0.823759	0.990472
							0.56281	0.0588399	0.127486	0.11768	0.823759	0.0490333		0.548486	0.107873	0.568786	0.549172	0.872792	0.0490333		0.458379	0.990472	0.598206	0.617819	0.872792	1.08854
							0.585322	0.0784532	0.11768	0.11768	0.892405	0.0392266		0.570426	0.107873	0.627626	0.608012	0.813952	0.0490333		0.476714	1.0297	0.617819	0.686466	0.931632	1.14738
							0.607834	0.0784532	0.107873	0.107873	1.01008	0.02942		0.592365	0.107873	0.696272	0.676659	0.0588399	0.0490333		0.49505	1.13757	0.666852	0.745305	0.951245	1.19641
							0.630347	0.0588399	0.107873	0.0490333	1.11796	0.0196133		0.614305	0.107873	0.804145	0.745305	0.0784532	0.02942		0.513385	1.70636	0.715885	0.784532	1.0395	1.24544
							0.652859	0.0392266	0.0980665	0.02942	0.0196133	0.0196133		0.636244	0.107873	0.862985	0.823759	0.0686466	0.0196133		0.53172	0.941438	0.755112	0.853179	1.1866	1.24544
							0.675371	0.0196133	0.02942	0	0	0.0490333		0.658183	0.107873	0.921825	0.921825	0.0686466	0.0196133		0.550055	1.27486	0.804145	0.921825	1.43177	1.16699
							0.697884	0	0	0.0196133	0.0196133	0.0882598		0.680123	0.107873	1.01989	1.0297	0.0686466	0.0196133		0.56839	3.10871	0.882598	1.01008	1.56906	1.27486
							0.720396	0.0392266	0.0196133	0.0588399	0.0588399	0.127486		0.702062	0.107873	0.0882598	1.14738	0.107873	0.0686466		0.586725	7.26673	1.01989	1.06892	1.01989	1.13757
							0.742909	0.0784532	0.0588399	0.0784532	0.0784532	0.186326		0.724002	0.107873	0.0882598	0.0686466	0.0980665	0.107873		0.605061	8.76715	1.11796	1.12776	1.13757	1.96133
							0.765421	0.0882598	0.0980665	0.0686466	0.11768	0.186326		0.745941	0.107873	0.0784532	0.0784532	0.0588399	0.127486		0.623396	8.73773	1.16699	0.539366	1.44158	2.98122
																					0.641731	2.48108	1.25525	0.558979	1.9221	1.99075
																					0.660066	1.90249	1.31409	0.627626	4.36396	6.43316
																					0.678401	1.63771	1.38274	0.686466	4.40319	4.69739
																					0.696736	4.50125	1.45138	0.735499	7.62957	4.20705
																					0.715072	5.32501	1.57887	0.813952	8.04145	4.38357
																					0.733407	4.35415	1.71616	0.902212	4.47183	3.08909
																					0.751742	3.65788	4.95236	2.38302	4.05995	4.2757
																					0.770077	5.03081	5.03081	3.04006	5.52114	7.91397

## Sheet: Figure 5C
X axis	Y axis	Y axis error
Control LM	1	0
0.5	0.990667	0.00521051
1	0.846234	0.0143635
1.2	0.867948	0.044501

## Sheet: Figure 5E
X axis	Y axis
1	-4.71241
0.99	-4.69724
0.98	-4.68312
0.97	-4.67002
0.96	-4.65792
0.95	-4.64679
0.94	-4.63661
0.93	-4.62735
0.92	-4.61901
0.91	-4.61156
0.9	-4.605
0.89	-4.5993
0.88	-4.59446
0.87	-4.59047
0.86	-4.58731
0.85	-4.58499
0.84	-4.5835
0.83	-4.58283
0.82	-4.58298
0.81	-4.58394
0.8	-4.58572
0.79	-4.58832
0.78	-4.59173
0.77	-4.59596
0.76	-4.60102
0.75	-4.6069
0.74	-4.6136
0.73	-4.62115
0.72	-4.62953
0.71	-4.63877
0.7	-4.64886
0.69	-4.65982
0.68	-4.67165
0.67	-4.68437
0.66	-4.698
0.65	-4.71253
0.64	-4.728
0.63	-4.7444
0.62	-4.76176
0.61	-4.7801
0.6	-4.79942
0.59	-4.81976
0.58	-4.84112
0.57	-4.86354
0.56	-4.88703
0.55	-4.91161
0.54	-4.93732
0.53	-4.96416
0.52	-4.99218
0.51	-5.0214
0.5	-5.05185
0.49	-5.08356
0.48	-5.11656
0.47	-5.15088
0.46	-5.18656
0.45	-5.22364
0.44	-5.26215
0.43	-5.30213
0.42	-5.34363
0.41	-5.38669
0.4	-5.43135
0.39	-5.47766
0.38	-5.52567
0.37	-5.57543
0.36	-5.627
0.35	-5.68043
0.34	-5.73578
0.33	-5.79312
0.32	-5.85249
0.31	-5.91398
0.3	-5.97766
0.29	-6.04358
0.28	-6.11184
0.27	-6.18251
0.26	-6.25567
0.25	-6.33141
0.24	-6.40982
0.23	-6.491
0.22	-6.57504
0.21	-6.66206
0.2	-6.75215
0.19	-6.84543
0.18	-6.94203
0.17	-7.04207
0.16	-7.14567
0.15	-7.25298
0.14	-7.36413
0.13	-7.47929
0.12	-7.59861
0.11	-7.72226
0.1	-7.8504
0.09	-7.98323
0.08	-8.12093
0.07	-8.26372
0.06	-8.41179
0.05	-8.56539
0.04	-8.72473
0.03	-8.89008
0.02	-9.06169
0.01	-9.23985

## Sheet: Figure 5F
Control LM		V=0.5mL		V=1.0mL		V=1.2mL			X,Y is normalized by maximum values
X axis	Y axis	X axis	Y axis	X axis	Y axis	X axis	Y axis
0	0	0	0	0	0	0	0
0.05	0.0196133	0.05	0.00980665	0.05	0	0.05	0.0490333
0.1	0.02942	0.1	0.0686466	0.1	0.00980665	0.1	0.0784532
0.15	0.0392266	0.15	0.0784532	0.15	0.00980665	0.15	0.107873
0.2	0.0490333	0.2	0.0784532	0.2	0.00980665	0.2	0.137293
0.25	0.0588399	0.25	0.0882598	0.25	0.0882598	0.25	0.137293
0.3	0.127486	0.3	0.127486	0.3	0.0882598	0.3	0.137293
0.35	0.156906	0.35	0.156906	0.35	0.107873	0.35	0.1471
0.4	0.166713	0.4	0.17652	0.4	0.11768	0.4	0.20594
0.45	0.196133	0.45	0.20594	0.45	0.1471	0.45	0.245166
0.5	0.225553	0.5	0.23536	0.5	0.166713	0.5	0.284393
0.55	0.23536	0.55	0.254973	0.55	0.196133	0.55	0.313813
0.6	0.254973	0.6	0.294199	0.6	0.215746	0.6	0.353039
0.65	0.274586	0.65	0.323619	0.65	0.245166	0.65	0.392266
0.7	0.313813	0.7	0.362846	0.7	0.284393	0.7	0.421686
0.75	0.343233	0.75	0.392266	0.75	0.313813	0.75	0.441299
0.8	0.372653	0.8	0.441299	0.8	0.343233	0.8	0.470719
0.85	0.421686	0.85	0.500139	0.85	0.382459	0.85	0.509946
0.9	0.460913	0.9	0.568786	0.9	0.431493	0.9	0.539366
0.95	0.500139	0.95	0.627626	0.95	0.480526	0.95	0.608012
1	0.568786	1	0.696272	1	0.519752	1	0.706079
1.05	0.608012	1.05	0.755112	1.05	0.578592	1.05	0.764919
1.1	0.686466	1.1	0.823759	1.1	0.647239	1.1	0.823759
1.15	0.764919	1.15	0.912018	1.15	0.715885	1.15	0.882598
1.2	0.853179	1.2	1.01989	1.2	0.794339	1.2	0.931632
1.25	0.941438	1.25	1.12776	1.25	0.872792	1.25	1.0395
1.3	1.0395	1.3	1.27486	1.3	0.970858	1.3	1.15718
1.35	1.14738	1.35	1.42196	1.35	1.05912	1.35	1.30428
1.4	1.27486	1.4	1.58868	1.4	1.16699	1.4	1.59848
1.45	1.43177	1.45	1.775	1.45	1.29448	1.45	3.37349
1.5	1.58868	1.5	1.99075	1.5	1.37293	1.5	5.35443
1.55	1.775	1.55	2.24572	1.55	1.51022	1.55	4.70719
1.6	2.00056	1.6	2.54973	1.6	1.70636	1.6	1.7652
1.65	2.23592	1.65	2.90277	1.65	1.9221	1.65	3.62846
1.65	2.26534	1.7	3.28523	1.7	2.15746	1.7	6.0409
1.6	2.00056	1.75	3.61865	1.75	2.41244	1.75	4.67777
1.55	1.775	1.8	3.63827	1.8	2.63799	1.8	3.82459
1.5	1.56906	1.8	3.63827	1.85	2.67722	1.85	5.1681
1.45	1.38274	1.75	3.31465	1.8	2.68702	1.9	6.55084
1.4	1.22583	1.7	2.90277	1.75	2.53012	1.95	5.79573
1.35	1.08854	1.65	2.54973	1.7	2.2163	2	5.11907
1.3	1.01008	1.6	2.23592	1.65	1.95152	2.05	4.48164
1.25	0.902212	1.55	1.95152	1.6	1.70636	2.1	5.80554
1.2	0.804145	1.5	1.74558	1.55	1.52003	2.1	5.80554
1.15	0.755112	1.45	1.52003	1.5	1.36312	2.05	4.29531
1.1	0.686466	1.4	1.35332	1.45	1.23564	2	3.56962
1.05	0.608012	1.35	1.21602	1.4	1.12776	1.95	0.862985
1	0.539366	1.3	1.07873	1.35	1.0297	1.9	7.5217
0.95	0.500139	1.25	0.990472	1.3	0.912018	1.85	2.26534
0.9	0.470719	1.2	0.872792	1.25	0.813952	1.8	2.70664
0.85	0.411879	1.15	0.784532	1.2	0.745305	1.75	6.10954
0.8	0.362846	1.1	0.706079	1.15	0.666852	1.7	7.17847
0.75	0.323619	1.05	0.627626	1.1	0.598206	1.65	1.52984
0.7	0.304006	1	0.568786	1.05	0.529559	1.6	1.42196
0.65	0.26478	0.95	0.519752	1	0.470719	1.55	1.30428
0.6	0.23536	0.9	0.470719	0.95	0.411879	1.5	1.1866
0.55	0.215746	0.85	0.421686	0.9	0.372653	1.45	1.07873
0.5	0.196133	0.8	0.382459	0.85	0.323619	1.4	1.00028
0.45	0.17652	0.75	0.343233	0.8	0.274586	1.35	0.921825
0.4	0.1471	0.7	0.304006	0.75	0.225553	1.3	0.862985
0.35	0.137293	0.65	0.26478	0.7	0.196133	1.25	0.804145
0.3	0.137293	0.6	0.225553	0.65	0.156906	1.2	0.764919
0.25	0.137293	0.55	0.20594	0.6	0.0980665	1.15	0.715885
0.2	0.0882598	0.5	0.17652	0.55	0.0784532	1.1	0.657046
0.15	0.0588399	0.45	0.166713	0.5	0.0392266	1.05	0.627626
0.1	0.0490333	0.4	0.1471	0.45	0	1	0.598206
0.05	0.0588399	0.35	0.127486			0.95	0.549172
0	0.0490333	0.3	0.0882598			0.9	0.519752
		0.25	0.0686466			0.85	0.490333
		0.2	0.0588399			0.8	0.451106
		0.15	0.0392266			0.75	0.421686
		0.1	0.0392266			0.7	0.382459
		0.05	0.02942			0.65	0.294199
		0	0.0196133			0.6	0.245166
						0.55	0.196133
						0.5	0.156906
						0.45	0.11768
						0.4	0.0784532
						0.35	0.0490333
						0.3	0.02942
						0.25	0.02942
						0.2	0.0196133
						0.15	0.00980665
						0.1	0.00980665
						0.05	0.00980665
						-9.76996e-15	0

## Sheet: Figure 6B
Control LM		V=0.5mL		V=1.0mL		V=1.2mL
Y axis	Y axis	Y axis	Y axis	Y axis	Y axis	Y axis	Y axis
Bounce	Broken	Bounce	Broken	Bounce	Broken	Bounce	Broken
0.729952	0.628026	0.989866	0.90852	1.57124	1.41012	2.57169	1.71119
0.683301	0.625673	1.00555	0.880294	2.01149	1.41012	2.16908	1.58241
0.801301	0.591567	0.991826	0.917341	1.76725	1.42521	2.47682	1.57359
0.913813	0.619793	1.07376	0.903228	1.78646	1.35406	2.30747	1.69355
0.954387	0.615089	1.11688	0.906756	1.76451	1.53086	2.76614	2.12576
0.957916	0.63861	1.07807	0.887351	1.77823	1.47696	2.71439	1.84174
0.987906	0.640963	1.22077	0.897936	1.91544	1.44677	3.08583	2.15399
0.982025	0.5998	1.20195	0.882058	2.02579	1.44462	2.89982	1.96346
1.07807	0.645667	1.23018	0.897936	2.15516	1.31525	2.30864	2.11518
0.978105	0.63861	1.18313	0.915577	2.03756	1.33681	2.66029	1.57006
0.999666	0.713487	1.21371	0.980065	2.32275	1.53831	3.01194	2.96568
1.04475	0.690162	1.19725	1.00555	1.91309	1.58535	3.0872	2.83239
1.06435	0.735441	1.1996	0.982025	2.19221	1.55478	3.27655	2.42076
1.06631	0.734069	1.29702	0.991826	2.08244	1.75471	2.76888	1.94053
1.09316	0.697022	1.28173	0.985945	2.20926	1.75	3.03507	2.18162
1.12119	0.69565	1.29957	0.980065	2.20926	1.56183	3.02409	2.31687
1.11257	0.740929	1.29702	0.987906	2.28924	1.58535	3.10916	2.19339
1.0867	0.702511	1.30466	1.07376	2.35588	1.64651	2.81827	2.52857
1.12551	0.823255	1.3225	1.08238	2.3992	1.60417	2.832	1.82684
1.12119	0.834231	1.27408	1.10395	2.33255	1.79901	3.19305	2.10008
1.09316	0.826391	1.28428	1.10179	2.13929	1.73785	2.91373	1.86075
1.06298	0.835799	1.29192	1.11473	2.24592	1.5977	3.62526	2.38469
1.11688	0.809142	1.39679	1.10653	2.7873	1.66395	2.86669	2.50759
1.24429	0.835799	1.37758	1.09316	2.31805	1.78372	2.83141	2.86767
1.16902	0.831095	1.42149	1.21371	2.4239	1.7353	3.49295	2.71674
1.21842	0.812278	1.37758	1.21842	2.63206	1.86271	3.27832	2.87629
1.19254	0.829527	1.39404	1.17608	2.20162	1.65121	2.90491	2.52916
1.21842	0.904992	1.41051	1.26644	2.33216	1.63847	2.88433	3.01213
1.17137	0.876766	1.42149		2.16281	1.71492	2.94608	2.15928
1.15256	0.943803	1.39404		2.23337	1.73158	3.89517	2.29335
1.2043	0.922633	1.38581		2.39097	1.71786	3.22402	2.2369
1.22547	0.913813	1.39953		2.40586	1.90446	3.82931	2.41096
1.16432	0.903228	1.4848		2.4729	1.86879	3.66936	2.2863
	0.943803	1.48774		2.37235	1.96405	3.16443	2.41096
	1.04671	1.48774		2.51014	2.05226	3.21148	3.29988
	1.00555	1.4848		2.55856	1.77294	3.10171	3.02977
	1.1061	1.53478		2.54366	2.07578	3.20207	2.9202
		1.49656		2.50642	1.88466	3.73522	2.39528
		1.49068		2.27179	2.02285	3.16443	3.66427
					1.92563		2.98018
					1.98836		3.14209
					2.14517
					1.94445
					2.16398
					1.91622
					2.01031
					2.29923
					2.27924
					2.26513
					2.34275

## Sheet: Figure S1
X axis	Y axis
0.1	11877
0.126	11885
0.158	11871
0.2	11858
0.251	11864
0.316	11875
0.398	11873
0.501	11875
0.631	11872
0.794	11868
1	11871
1.26	11877
1.58	11876
2	11876
2.51	11873
3.16	11871
3.98	11873
5.01	11873
6.31	11874
7.94	11872
10	11871
12.6	11871
15.8	11869
20	11868
25.1	11862
31.6	11858
39.8	11852
50.1	11842
63.1	11829
79.4	11804
100	11772
126	11725
158	11657
200	11562
251	11433
316	11251
398	10979
501	7632.9
631	4383.6
794	2584
1000	1458

## Sheet: Figure S2
Diameter	V=0mL	0.1mL	0.5mL	1mL	1.2mL	1.3mL	1.5mL		Sphericity	V=0mL	0.1mL	0.5mL	1mL	1.2mL	1.3mL	1.5mL
X axis	Y axis	Y axis	Y axis	Y axis	Y axis	Y axis	Y axis		X axis	Y axis	Y axis	Y axis	Y axis	Y axis	Y axis	Y axis
10	0	0	0	0	0	0	0		0	0	0	0	0	0	0	0
30	0	0	0	0	0	0	0		0.025	0	0	0	0	0	0	0
50	0.015	0.165	0.145	0.025	0	0	0		0.05	0	0	0	0	0	0	0
70	0.225	0.44	0.565	0.29	0	0	0		0.075	0	0	0	0	0	0	0
90	0.23	0.28	0.175	0.36	0.005	0.005	0		0.1	0	0	0	0	0	0	0
110	0.21	0.065	0.065	0.16	0.09	0	0		0.125	0	0	0	0	0	0	0
130	0.13	0.025	0.025	0.09	0.075	0.005	0		0.15	0	0	0	0	0	0	0
150	0.07	0.005	0.01	0.04	0.13	0.03	0		0.175	0	0	0	0	0	0	0
170	0.04	0.005	0.005	0.01	0.075	0.045	0		0.2	0	0	0	0	0	0	0
190	0.035	0.015	0.005	0.02	0.08	0.05	0		0.225	0	0.0150754	0.00502513	0	0	0	0
210	0.02	0	0	0.005	0.075	0.035	0		0.25	0.00502513	0	0.00502513	0	0	0	0
230	0.01	0	0	0	0.095	0.06	0		0.275	0.00502513	0.00502513	0.00502513	0	0	0	0
250	0.005	0	0	0	0.06	0.02	0		0.3	0.00502513	0.0150754	0.00502513	0.0100503	0	0	0
270	0.01	0	0.005	0	0.08	0.01	0		0.325	0	0.00502513	0.0150754	0.00502513	0.0100503	0	0
290	0	0	0	0	0.055	0.01	0		0.35	0	0.0251256	0.0251256	0.0100503	0.0100503	0	0
310	0	0	0	0	0.055	0.035	0		0.375	0.0100503	0.0251256	0.0100503	0.00502513	0.0100503	0	0
330	0	0	0	0	0.06	0.03	0		0.4	0.0100503	0.0251256	0.0150754	0.0201005	0.00502513	0	0
350	0	0	0	0	0.01	0.01	0		0.425	0.0100503	0.0201005	0.0251256	0.0251256	0.0150754	0	0
370	0	0	0	0	0	0.01	0		0.45	0.0150754	0.0452261	0.0201005	0.00502513	0.0201005	0.00502513	0
390	0	0	0	0	0.015	0.035	0		0.475	0.0301508	0.0251256	0.0351759	0.0452261	0.0100503	0.0201005	0
410	0	0	0	0	0.005	0.03	0		0.5	0.040201	0.0603015	0.0351759	0.0150754	0.0201005	0.0150754	0
430	0	0	0	0	0.005	0.02	0		0.525	0.0301508	0.0301508	0.0251256	0.0502513	0.040201	0.0201005	0
450	0	0	0	0	0	0.02	0		0.55	0.0452261	0.0603015	0.0351759	0.0251256	0.040201	0.0251256	0
470	0	0	0	0	0	0.035	0		0.575	0.0301508	0.0854271	0.0703518	0.0301508	0.0502513	0.0301508	0.00671141
490	0	0	0	0	0.01	0.05	0		0.6	0.0452261	0.0301508	0.0351759	0.0251256	0.0552764	0.0502513	0.00671141
510	0	0	0	0	0	0.005	0		0.625	0.0502513	0.0552764	0.0351759	0.0502513	0.040201	0.0351759	0
530	0	0	0	0	0.01	0.03	0		0.65	0.0603015	0.0502513	0.0603015	0.0502513	0.0452261	0.0653266	0.00671141
550	0	0	0	0	0.01	0.015	0		0.675	0.0603015	0.0653266	0.0552764	0.040201	0.0452261	0.0653266	0.00671141
570	0	0	0	0	0	0.015	0		0.7	0.0502513	0.040201	0.0552764	0.0301508	0.080402	0.0703518	0.0201342
590	0	0	0	0	0	0.01	0		0.725	0.080402	0.0301508	0.0301508	0.040201	0.0653266	0.105528	0.033557
610	0	0	0	0	0	0.015	0		0.75	0.0603015	0.0301508	0.0502513	0.080402	0.0351759	0.0502513	0.033557
630	0	0	0	0	0	0.005	0		0.775	0.0603015	0.040201	0.0452261	0.0753769	0.040201	0.0351759	0.033557
650	0	0	0	0	0	0.02	0		0.8	0.0452261	0.040201	0.0653266	0.0201005	0.0603015	0.080402	0.0402685
670	0	0	0	0	0	0.015	0		0.825	0.0301508	0.0251256	0.040201	0.0502513	0.0552764	0.0552764	0.0604027
690	0	0	0	0	0	0.015	0		0.85	0.0251256	0.0502513	0.0251256	0.0653266	0.0452261	0.0954774	0.0402685
710	0	0	0	0	0	0.01	0		0.875	0.0201005	0.0150754	0.0301508	0.0753769	0.040201	0.0351759	0.0872483
730	0	0	0	0	0	0.02	0		0.9	0.0351759	0.0201005	0.040201	0.0100503	0.0452261	0.0452261	0.0872483
750	0	0	0	0	0	0.01	0		0.925	0.0351759	0.0100503	0.0251256	0.0351759	0.0351759	0.040201	0.114094
770	0	0	0	0	0	0.015	0		0.95	0.0251256	0.0251256	0.0301508	0.0351759	0.0301508	0.0251256	0.14094
790	0	0	0	0	0	0.015	0		0.975	0.0502513	0.0150754	0.0251256	0.0502513	0.0251256	0.0150754	0.181208
810	0	0	0	0	0	0.015	0		1	0.0301508	0.0150754	0.0201005	0.0201005	0.0251256	0.0150754	0.100671
830	0	0	0	0	0	0.02	0
850	0	0	0	0	0	0.005	0
870	0	0	0	0	0	0.015	0
890	0	0	0	0	0	0.01	0
910	0	0	0	0	0	0	0
930	0	0	0	0	0	0.01	0
950	0	0	0	0	0	0.02	0
970	0	0	0	0	0	0.02	0
990	0	0	0	0	0	0.005	0
1010	0	0	0	0	0	0.005	0
1030	0	0	0	0	0	0.005	0
1050	0	0	0	0	0	0.01	0
1070	0	0	0	0	0	0	0
1090	0	0	0	0	0	0.005	0
1110	0	0	0	0	0	0.02	0
1130	0	0	0	0	0	0	0
1150	0	0	0	0	0	0.015	0
1170	0	0	0	0	0	0.005	0
1190	0	0	0	0	0	0	0
1210	0	0	0	0	0	0.005	0
1230	0	0	0	0	0	0.005	0
1250	0	0	0	0	0	0.01	0
1270	0	0	0	0	0	0	0
1290	0	0	0	0	0	0	0
1310	0	0	0	0	0	0	0
1330	0	0	0	0	0	0	0
1350	0	0	0	0	0	0.005	0
1370	0	0	0	0	0	0	0
1390	0	0	0	0	0	0	0
1410	0	0	0	0	0	0.01	0
1430	0	0	0	0	0	0	0
1450	0	0	0	0	0	0	0
1470	0	0	0	0	0	0.005	0
1490	0	0	0	0	0	0.005	0
1510	0	0	0	0	0	0	0
1530	0	0	0	0	0	0	0
1550	0	0	0	0	0	0	0
1570	0	0	0	0	0	0.005	0
1590	0	0	0	0	0	0	0
1610	0	0	0	0	0	0	0
1630	0	0	0	0	0	0	0
1650	0	0	0	0	0	0	0
1670	0	0	0	0	0	0	0
1690	0	0	0	0	0	0	0
1710	0	0	0	0	0	0	0
1730	0	0	0	0	0	0	0.0134228
1750	0	0	0	0	0	0.005	0
1770	0	0	0	0	0	0	0
1790	0	0	0	0	0	0	0
1810	0	0	0	0	0	0	0.00671141
1830	0	0	0	0	0	0	0
1850	0	0	0	0	0	0	0
1870	0	0	0	0	0	0	0
1890	0	0	0	0	0	0	0.00671141
1910	0	0	0	0	0	0	0.00671141
1930	0	0	0	0	0	0	0
1950	0	0	0	0	0	0	0
1970	0	0	0	0	0	0	0
1990	0	0	0	0	0	0	0.0134228
2010	0	0	0	0	0	0	0
2030	0	0	0	0	0	0	0.00671141
2050	0	0	0	0	0	0	0
2070	0	0	0	0	0	0	0.00671141
2090	0	0	0	0	0	0	0
2110	0	0	0	0	0	0	0
2130	0	0	0	0	0	0	0
2150	0	0	0	0	0	0	0.00671141
2170	0	0	0	0	0	0	0.00671141
2190	0	0	0	0	0	0	0.00671141
2210	0	0	0	0	0	0	0.00671141
2230	0	0	0	0	0	0	0.00671141
2250	0	0	0	0	0	0	0
2270	0	0	0	0	0	0	0
2290	0	0	0	0	0	0	0
2310	0	0	0	0	0	0	0
2330	0	0	0	0	0	0	0
2350	0	0	0	0	0	0	0
2370	0	0	0	0	0	0	0.00671141
2390	0	0	0	0	0	0	0
2410	0	0	0	0	0	0	0
2430	0	0	0	0	0	0	0.00671141
2450	0	0	0	0	0	0	0.00671141
2470	0	0	0	0	0	0	0.00671141
2490	0	0	0	0	0	0	0
2510	0	0	0	0	0	0	0
2530	0	0	0	0	0	0	0
2550	0	0	0	0	0	0	0.00671141
2570	0	0	0	0	0	0	0.0134228
2590	0	0	0	0	0	0	0.00671141
2610	0	0	0	0	0	0	0.00671141
2630	0	0	0	0	0	0	0.0134228
2650	0	0	0	0	0	0	0
2670	0	0	0	0	0	0	0.00671141
2690	0	0	0	0	0	0	0.00671141
2710	0	0	0	0	0	0	0.00671141
2730	0	0	0	0	0	0	0
2750	0	0	0	0	0	0	0.0201342
2770	0	0	0	0	0	0	0
2790	0	0	0	0	0	0	0
2810	0	0	0	0	0	0	0
2830	0	0	0	0	0	0	0.00671141
2850	0	0	0	0	0	0	0
2870	0	0	0	0	0	0	0.00671141
2890	0	0	0	0	0	0	0
2910	0	0	0	0	0	0	0.0134228
2930	0	0	0	0	0	0	0.0134228
2950	0	0	0	0	0	0	0.0134228
2970	0	0	0	0	0	0	0.00671141
2990	0	0	0	0	0	0	0.00671141
3010	0	0	0	0	0	0	0.00671141
3030	0	0	0	0	0	0	0.00671141
3050	0	0	0	0	0	0	0.0268456
3070	0	0	0	0	0	0	0
3090	0	0	0	0	0	0	0.0134228
3110	0	0	0	0	0	0	0.00671141
3130	0	0	0	0	0	0	0.0201342
3150	0	0	0	0	0	0	0.00671141
3170	0	0	0	0	0	0	0.0201342
3190	0	0	0	0	0	0	0.0134228
3210	0	0	0	0	0	0	0
3230	0	0	0	0	0	0	0.0134228
3250	0	0	0	0	0	0	0.033557
3270	0	0	0	0	0	0	0
3290	0	0	0	0	0	0	0.0268456
3310	0	0	0	0	0	0	0.00671141
3330	0	0	0	0	0	0	0.00671141
3350	0	0	0	0	0	0	0
3370	0	0	0	0	0	0	0.0201342
3390	0	0	0	0	0	0	0
3410	0	0	0	0	0	0	0
3430	0	0	0	0	0	0	0.0134228
3450	0	0	0	0	0	0	0.0268456
3470	0	0	0	0	0	0	0.0201342
3490	0	0	0	0	0	0	0.0134228
3510	0	0	0	0	0	0	0
3530	0	0	0	0	0	0	0.0201342
3550	0	0	0	0	0	0	0.00671141
3570	0	0	0	0	0	0	0.00671141
3590	0	0	0	0	0	0	0.0268456
3610	0	0	0	0	0	0	0.0201342
3630	0	0	0	0	0	0	0.0201342
3650	0	0	0	0	0	0	0
3670	0	0	0	0	0	0	0.00671141
3690	0	0	0	0	0	0	0
3710	0	0	0	0	0	0	0.0134228
3730	0	0	0	0	0	0	0.00671141
3750	0	0	0	0	0	0	0.00671141
3770	0	0	0	0	0	0	0.00671141
3790	0	0	0	0	0	0	0.0134228
3810	0	0	0	0	0	0	0.00671141
3830	0	0	0	0	0	0	0.00671141
3850	0	0	0	0	0	0	0.00671141
3870	0	0	0	0	0	0	0.0201342
3890	0	0	0	0	0	0	0
3910	0	0	0	0	0	0	0
3930	0	0	0	0	0	0	0.0201342
3950	0	0	0	0	0	0	0.0134228
3970	0	0	0	0	0	0	0.00671141
3990	0	0	0	0	0	0	0.00671141
4010	0	0	0	0	0	0	0
4030	0	0	0	0	0	0	0
4050	0	0	0	0	0	0	0
4070	0	0	0	0	0	0	0.00671141
4090	0	0	0	0	0	0	0.0268456
4110	0	0	0	0	0	0	0.0134228
4130	0	0	0	0	0	0	0.0134228
4150	0	0	0	0	0	0	0.0134228
4170	0	0	0	0	0	0	0
4190	0	0	0	0	0	0	0
4210	0	0	0	0	0	0	0.00671141
4230	0	0	0	0	0	0	0.00671141
4250	0	0	0	0	0	0	0
4270	0	0	0	0	0	0	0.0134228
4290	0	0	0	0	0	0	0.00671141
4310	0	0	0	0	0	0	0.0134228
4330	0	0	0	0	0	0	0
4350	0	0	0	0	0	0	0
4370	0	0	0	0	0	0	0
4390	0	0	0	0	0	0	0
4410	0	0	0	0	0	0	0.00671141
4430	0	0	0	0	0	0	0
4450	0	0	0	0	0	0	0.0134228
4470	0	0	0	0	0	0	0
4490	0	0	0	0	0	0	0.00671141
4510	0	0	0	0	0	0	0
4530	0	0	0	0	0	0	0
4550	0	0	0	0	0	0	0
4570	0	0	0	0	0	0	0
4590	0	0	0	0	0	0	0
4610	0	0	0	0	0	0	0.00671141
4630	0	0	0	0	0	0	0
4650	0	0	0	0	0	0	0
4670	0	0	0	0	0	0	0
4690	0	0	0	0	0	0	0.00671141
4710	0	0	0	0	0	0	0
4730	0	0	0	0	0	0	0.0134228
4750	0	0	0	0	0	0	0
4770	0	0	0	0	0	0	0
4790	0	0	0	0	0	0	0
4810	0	0	0	0	0	0	0.00671141
4830	0	0	0	0	0	0	0
4850	0	0	0	0	0	0	0
4870	0	0	0	0	0	0	0
4890	0	0	0	0	0	0	0
4910	0	0	0	0	0	0	0
4930	0	0	0	0	0	0	0
4950	0	0	0	0	0	0	0
4970	0	0	0	0	0	0	0
4990	0	0	0	0	0	0	0

[truncated: 4 more sheets: Figure S4, Figure S5, Figure S6, Figure S7]
